# Supplementary material for: Antagonizing S1P3 Receptor with Cell-Penetrating Pepducins in Skeletal Muscle Fibrosis
Source: MDPI journal article supplement (doi:10.3390/ijms22168861), 2021-08-17
Supplement: s1 [file s1]

# Antagonizing S1P<sub>3</sub> Receptor with Cell-Penetrating Pepducins in Skeletal Muscle Fibrosis

Angela Corvino <sup>1</sup>, Ida Cerqua <sup>1</sup>, Alessandra Lo Bianco <sup>1</sup>, Giuseppe Caliendo <sup>1</sup>, Ferdinando Fiorino <sup>1</sup>, Francesco Frecentese <sup>1</sup>, Elisa Magli <sup>1</sup>, Elena Morelli <sup>1</sup>, Elisa Perissutti <sup>1</sup>, Vincenzo Santagada <sup>1</sup>, Giuseppe Cirino <sup>1</sup>, Elisabetta Granato <sup>1</sup>, Fiorentina Roviezzo <sup>1</sup>, Elisa Puliti <sup>2</sup>, Caterina Bernacchioni <sup>2</sup>, Antonio Lavecchia <sup>1</sup>, Chiara Donati <sup>2</sup> and Beatrice Severino <sup>1,\*†</sup>

<sup>1</sup> Department of Pharmacy, School of Medicine, University of Naples «Federico II», Via D. Montesano, 49, 80131 Napoli, Italy; angela.corvino@unina.it (A.C.); ida.cerqua@unina.it (I.C.); alessandra.lobianco@unina.it (A.L.B.); caliendo@unina.it (G.C.); fefiorin@unina.it (F.F.); frecente@unina.it (F.F.); elisa.magli@unina.it (E.M.); elena.morelli@unina.it (E.M.); perissut@unina.it (E.P.); santagad@unina.it (V.S.); cirino@unina.it (G.C.); elisabetta.granato@unina.it (E.G.); roviezzo@unina.it (F.R.); antonio.lavecchia@unina.it (A.L.)

<sup>2</sup> Department of Experimental and Clinical Biomedical Sciences “Mario Serio”, University of Florence, Viale GB Morgagni 50, 50134 Firenze, Italy; elisa.puliti@unifi.it (E.P.); caterina.bernacchioni@unifi.it (C.B.); chiara.donati@unifi.it (C.D.)

\* Correspondence: bseverin@unina.it; Tel.: +39-081-679-828

† Co-last authors.

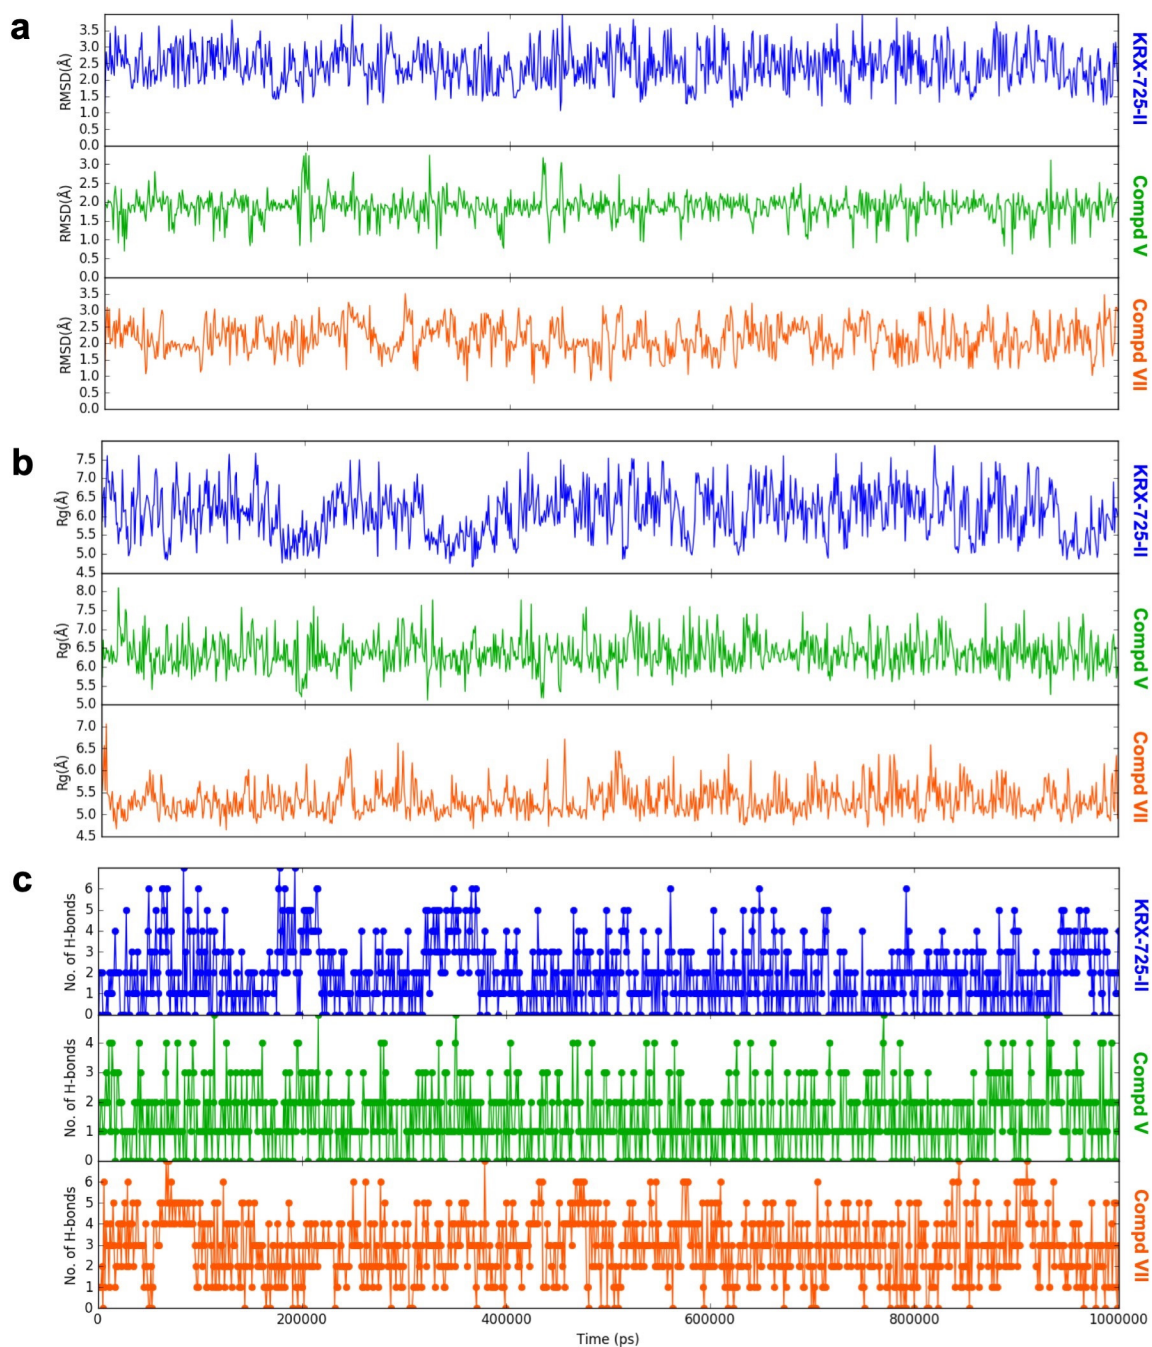

**Figure S1.** (a) Time evolution of the backbone RMSD compared to frame 0 for **KRX-725-II** (blue), compound **V** (green) and compound **VII** (orange) during 1000 ns of MD. (b) Variation of the Rg with time for **KRX-725-II** (blue), **V** (green) and **VII** (orange). (c) Total number of intramolecular H-bonds formed by **KRX-725-II** (blue), **V** (green) and **VII** (orange) during the entire simulation period.
